# Supplementary material for: Cyclic olefin copolymers containing both linear polyethylene and poly(ethylene-co-norbornene) segments prepared from chain shuttling copolymerization of ethylene and norbornene
Source: Royal Society of Chemistry journal article supplement (doi:10.1039/d1py01251g), 2021-12-03
Supplement: d1py01251g1.pdf [file d1py01251g1.pdf]

**Electronic Supplementary Information**

**Cyclic olefin copolymers containing both linear polyethylene and poly(ethylene-*co*-norbornene) segments prepared from chain shuttling copolymerization of ethylene and norbornene**

Huan Gao,<sup>a</sup> Shangtao Chen,<sup>b</sup> Bin Du,<sup>b</sup> Zhenyu Dai,<sup>c</sup> Xu Lu,<sup>c</sup> Kunyu Zhang,<sup>c</sup> Li Pan,<sup>\*,a</sup> Yang Li,<sup>\*,c</sup> Yuesheng Li<sup>a,d</sup>

<sup>a</sup> Tianjin Key Lab of Composite & Functional Materials, School of Materials Science and Engineering, Tianjin University, Tianjin 300072, China

<sup>b</sup> Synthetic Resin Laboratory, Petro China Petrochemical Research Institute, Beijing 102206, China

<sup>c</sup> Advanced Materials Research Center, Petrochemical Research Institute, PetroChina Company Limited, Beijing 102206, China

<sup>d</sup> Collaborative innovation center of Chemical Science & Engineering of Tianjin, Tianjin 300072, China

## Contents

|                                                                                                                                                                          |        |
|--------------------------------------------------------------------------------------------------------------------------------------------------------------------------|--------|
| 1. Synthesis of <i>rac</i> -[CH <sub>2</sub> (3- <i>tert</i> -butyl-1-indenyl) <sub>2</sub> ]ZrCl <sub>2</sub> .....                                                     | S3     |
| 2. Tables 1-2. Fraction results of the multiblock copolymer.....                                                                                                         | S4     |
| 3. Figure S1. Characterization of ligand and catalyst 2.....                                                                                                             | S5     |
| 4. Figure S2. <sup>13</sup> C{ <sup>1</sup> H} NMR spectra of E/NBE copolymer by single catalyst system.....                                                             | S5     |
| 5. Figure S3-4. Molecular weight distribution curves of copolymers synthesized with different chain transfer agent.....                                                  | S6-7   |
| 6. Figure S5. <sup>13</sup> C{ <sup>1</sup> H} NMR spectra of poly(ethylene- <i>co</i> -norbornene) copolymer.....                                                       | S8     |
| 7. Figure S6-7. GPC elute traces of copolymer obtained by two catalysts Et <sub>2</sub> Zn.....                                                                          | S8-9   |
| 8. Figure S8. <sup>13</sup> C{ <sup>1</sup> H} NMR spectra of the MTHF-soluble portion and the insoluble portion of poly(ethylene- <i>co</i> -norbornene) copolymer..... | S9     |
| 9. Figure S9-11. DSC curves of poly(ethylene- <i>co</i> -norbornene) copolymers.....                                                                                     | S10-11 |
| 10. Figure S12-15. GPC elute traces and molecular weight distributions by peak fitting of copolymer.....                                                                 | S11-13 |
| 11. Figure S16-19. <sup>13</sup> C{ <sup>1</sup> H} NMR spectra of poly(ethylene- <i>co</i> -norbornene) copolymers obtained under different conditions .....            | S13-14 |
| 12. Figure S20. Loss modulus of copolymers obtained with variable ZnEt <sub>2</sub> /catalyst ratio.....                                                                 | S14    |
| 13. Figure S21. <sup>1</sup> H NMR spectra and expansions (between 4.4 and 5.7 ppm) of copolymer under high reaction temperature.....                                    | S15    |
| 14. Figure S22. DMA of copolymers obtained with variable ZnEt <sub>2</sub> /catalyst ratio .....                                                                         | S15    |
| 15. Figure S23. Tensile properties of copolymers obtained with Cat.1\ZnEt <sub>2</sub> or (Cat.1+Cat.2)\ ZnEt <sub>2</sub> .....                                         | S16    |

1. **Synthesis of *rac*-[CH<sub>2</sub>(3-*tert*-butyl-1-indenyl)<sub>2</sub>]ZrCl<sub>2</sub>.** To a 250 mL Schlenk tube, 3.46 g of bis(3-*tert*-butyl-1-indenyl)methane (98.9% GC, 9.6 mmol) was added in 60 mL of Et<sub>2</sub>O. At 0 °C, 22.0 mmol of BuLi (2.5 M in hexane) was added dropwise over 6 min under stirring. The solution was then warmed to room temperature and stirred for 24 h. In another flask, 60 mL of toluene and 2.46 g of ZrCl<sub>4</sub> (10.6 mmol) were added and cooled to -20 °C, then the mixture was quickly added to the lithium salt suspension in Et<sub>2</sub>O at -20 °C. The reaction mixture was kept at -20 and reacted for 1 h. Then it was stirred overnight at room temperature, and finally Et<sub>2</sub>O was removed under reduced pressure. The resulting toluene suspension was filtered, and the filtrate was evaporated under reduced pressure to give 3.26 g of a red powder as crude product (yield: 65.7%). The crude product was washed with tetrahydrofuran and dried under vacuum to give (1.2 g of red violet powder) pure *meso*-Cat. **2** as the final product (yield: 24.2%).

**Table S1** Fraction of representative copolymers obtained with different Et<sub>2</sub>Zn/catalyst ratios by methyl-tetrahydrofuran

| Catalyst Package                 | Soluble polymer |    | Insoluble polymer |     |
|----------------------------------|-----------------|----|-------------------|-----|
|                                  | g               | %  | g                 | wt% |
| Cat.(1+ 2)                       | 0.17            | 42 | 0.23              | 58  |
| Cat.(1+ 2)+5 Et <sub>2</sub> Zn  | 0.16            | 40 | 0.24              | 60  |
| Cat.(1+ 2)+10 Et <sub>2</sub> Zn | 0.12            | 30 | 0.28              | 70  |

The copolymers (corresponding to Runs 3, 4, and 5 in Table 4) were refluxed with methyl-tetrahydrofuran (MTHF) at 85±2 °C for 6 hours. The insoluble portion content gradually increased as Et<sub>2</sub>Zn/catalyst ratio increasing.

**Table S2** Summary results of cross fractionation chromatography in 1,2,4-trichlorobenzene.

| Fraction | Eluted temperature(°C) | Et <sub>2</sub> Zn/Zr = 10 |        |
|----------|------------------------|----------------------------|--------|
|          |                        | Wt.%                       | Σ Wt.% |
| 1        | 35                     | 34.44                      | 34.43  |
| 2        | 60                     | 5.73                       | 40.16  |
| 3        | 85                     | 21.38                      | 61.54  |
| 4        | 100                    | 38.45                      | 100    |
| 5        | 115                    | 0                          | 100    |

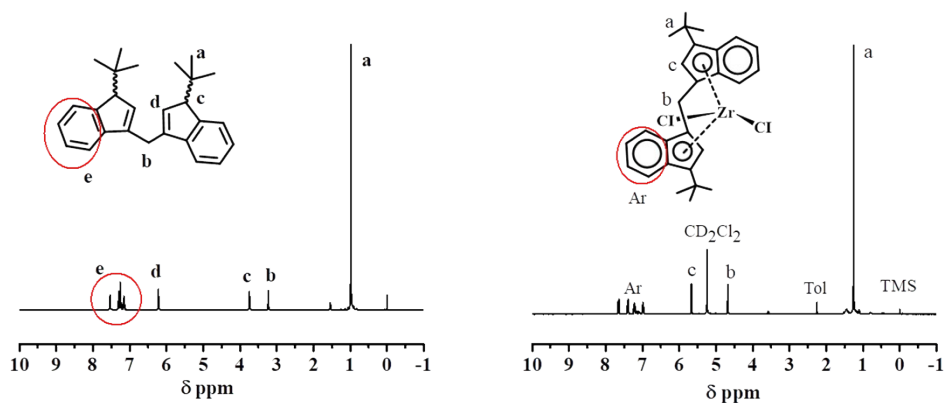

**Fig. S1.** The  $^1\text{H}$  NMR spectra of ligand (left) and catalyst **2** (right).

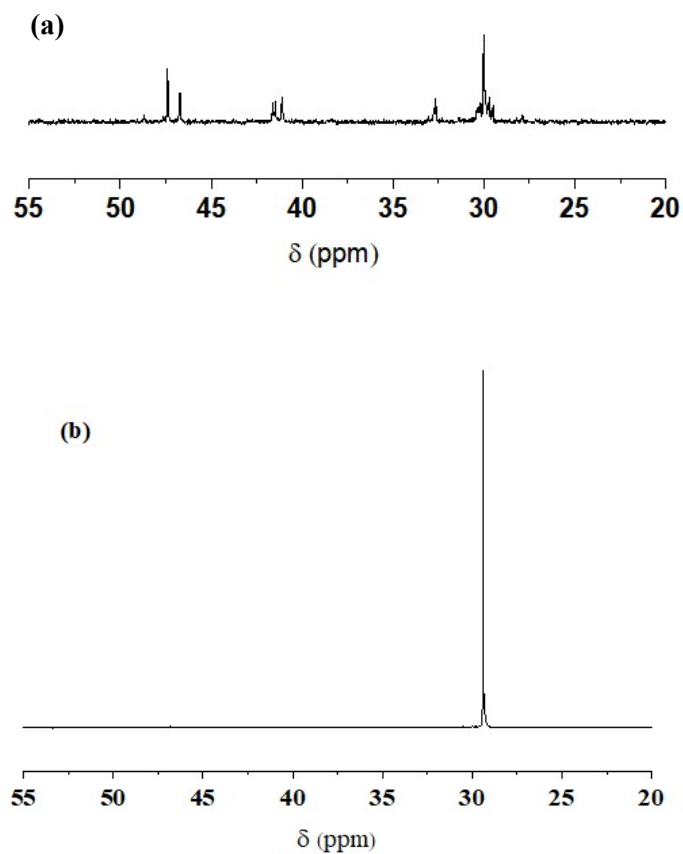

**Fig. S2** (a)  $^{13}\text{C}\{^1\text{H}\}$  NMR spectrum of poly(ethylene-*co*-norbornene) copolymer synthesized by catalyst **1** (Run 1 in Table 1, NBE incorporation = 27 mol%), and (b)  $^{13}\text{C}\{^1\text{H}\}$  NMR spectrum of copolymer synthesized by catalyst **2** (Run 11 in Table 1, negligible NBE incorporation was found).

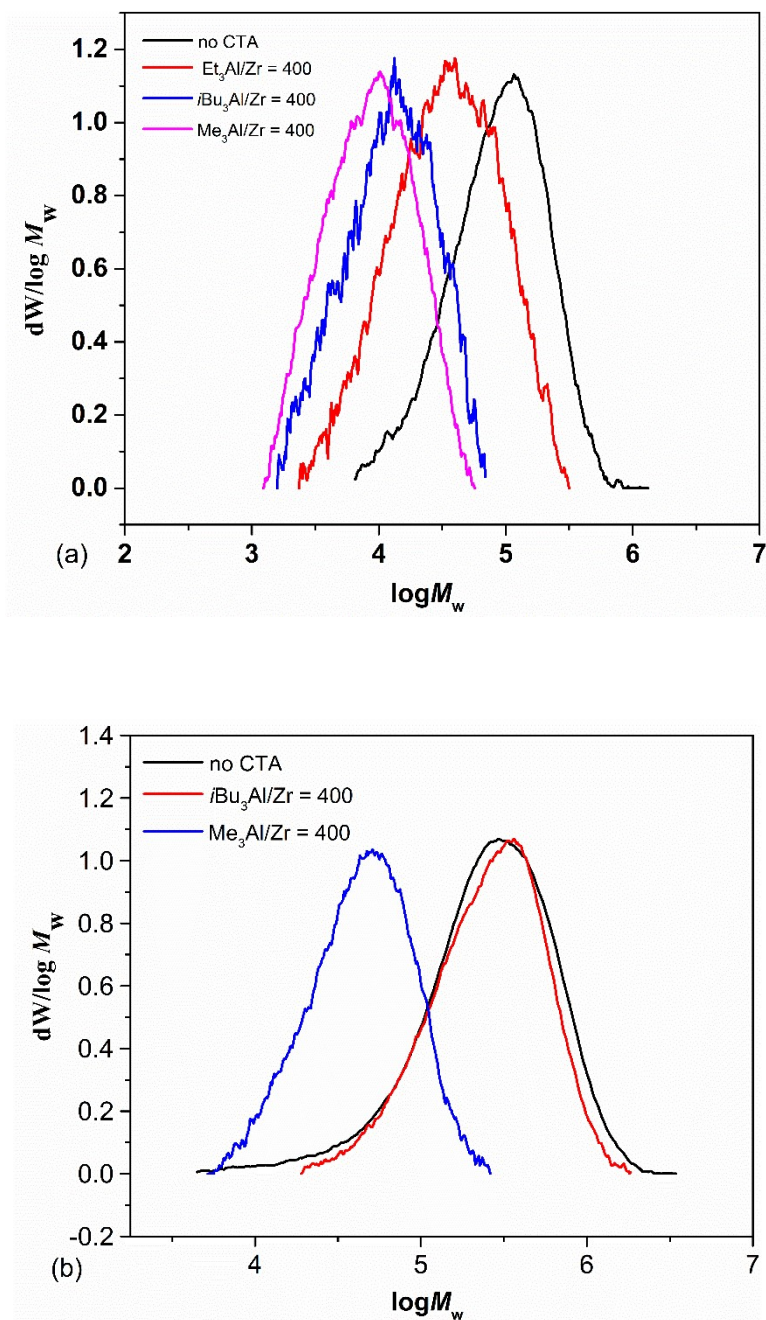

**Fig. S3** Molecular weight distribution curves of copolymers synthesized from ethylene and NBE copolymerization with variable CTA synthesized by (a) Cat.1 (Runs 1, 3, 5 and 7) and (b) Cat.2 (Runs 11, 13 and 17) in Table 1.

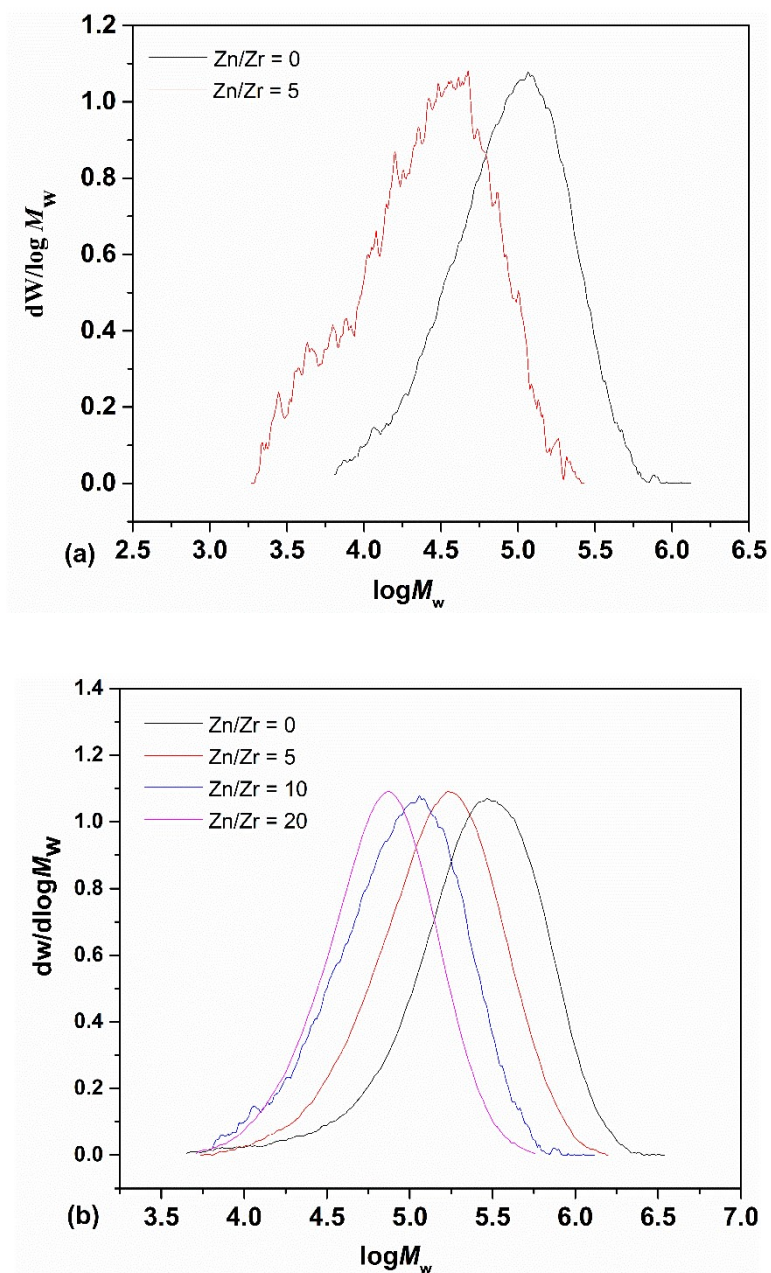

**Fig. S4** Molecular weight distributions of copolymers synthesized from ethylene and NBE copolymerization with variable CTA by (a) Cat.1 (Runs 1 and 8) and (b) Cat.2 (Runs 11, 18, 19 and 20) in Table 1.

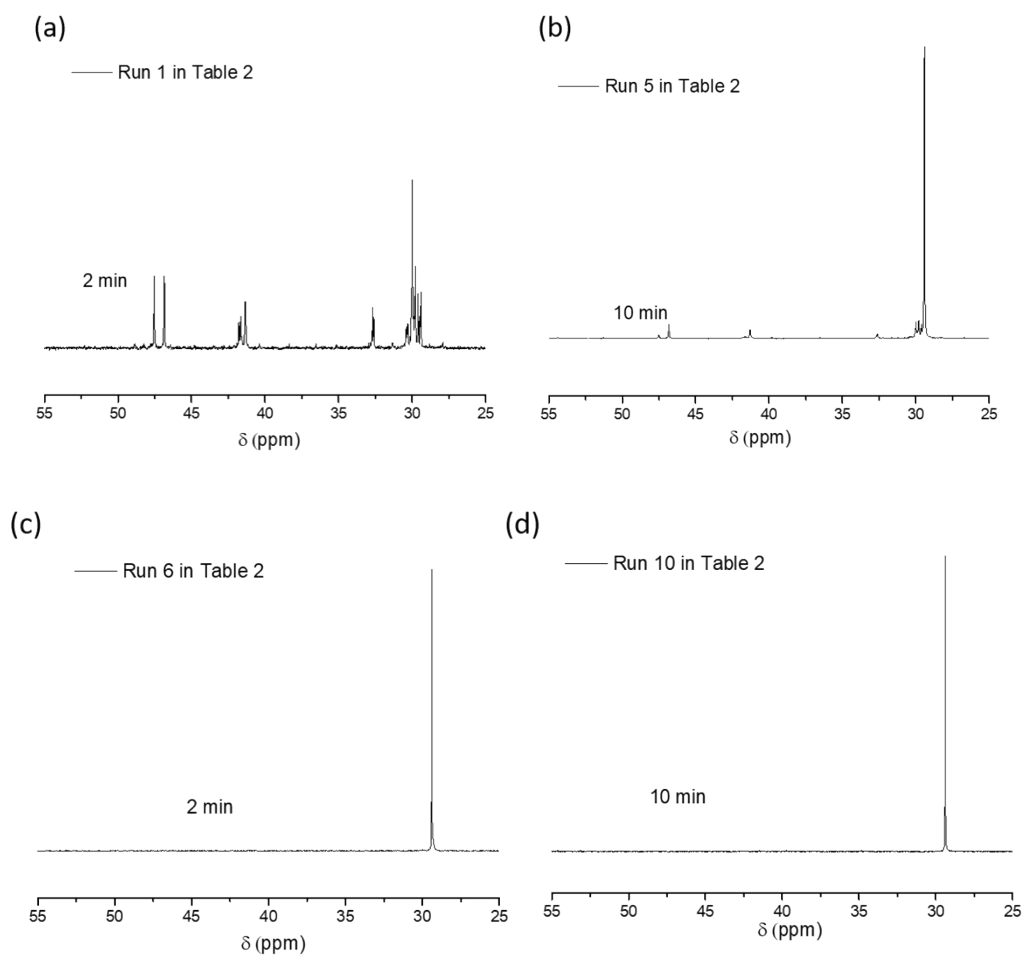

**Fig. S5**  $^{13}\text{C}\{^1\text{H}\}$  NMR spectra of poly(ethylene-*co*-norbornene) copolymer (a) Run 1, (b) Run 5, (c) Run 6 and (d) Run 10 in Table 2.

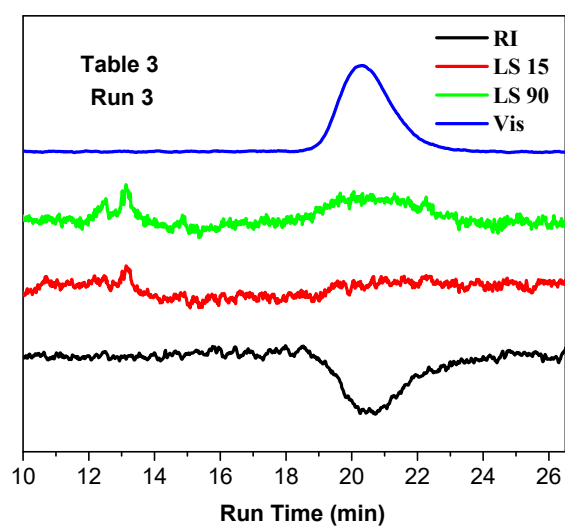

**Fig. S6** GPC eluting traces of copolymer obtained by two catalysts with 10 equivalents of  $\text{Et}_2\text{Zn}$  (Run 3 in Table 3).



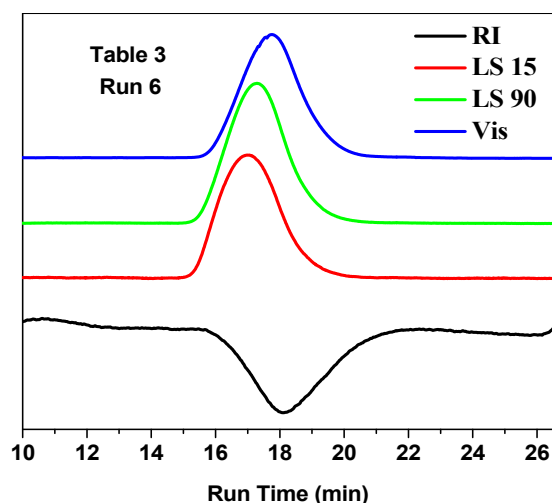

**Fig. S7** GPC elute traces of copolymer obtained by two catalysts with 10 equivalents of Et<sub>2</sub>Zn (Run 6 in Table 3)

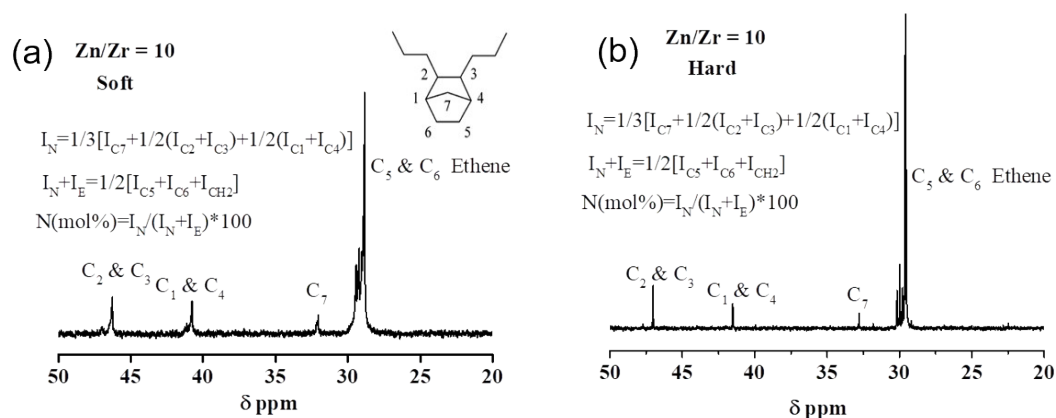

**Fig. S8** <sup>13</sup>C{<sup>1</sup>H} NMR spectra of (a) MTHF-soluble portion (0.12 g, NBE: 13 mol%) and (b) insoluble portion (0.28 g, NBE: 2.2 mol%) of poly(ethylene-*co*-norbornene) copolymer prepared by catalysts **1** and **2** in the presence of 10 equivalents of Et<sub>2</sub>Zn (Run 5 in Table 4).

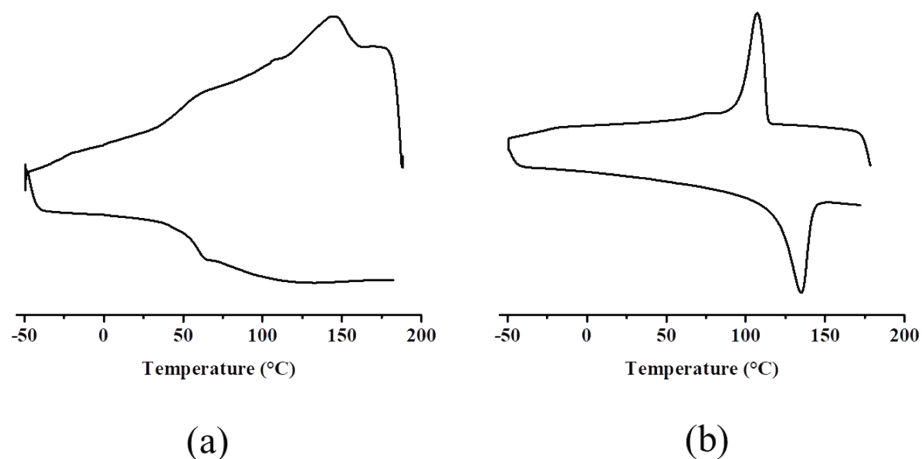

**Fig. S9** DSC (cooling and the second heating) curves of poly(ethylene-*co*-norbornene) copolymers prepared by (a) catalyst 1 in absence CTA (Run 1 in Table 1) and (b) catalyst 2 in absence CTA (Run 11 in Table 1).

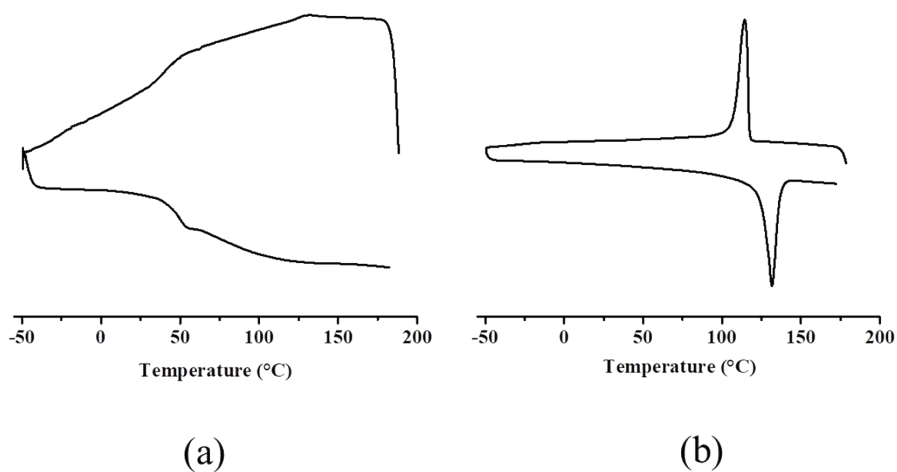

**Fig. S10** DSC curves of poly(ethylene-*co*-norbornene) copolymers prepared by (a) catalyst 1 in the presence of 20 equivalents ZnEt<sub>2</sub> (Run 10 in Table 1) and (b) catalyst 2 in the presence of 20 equivalents ZnEt<sub>2</sub> (Run 20 in Table 1).

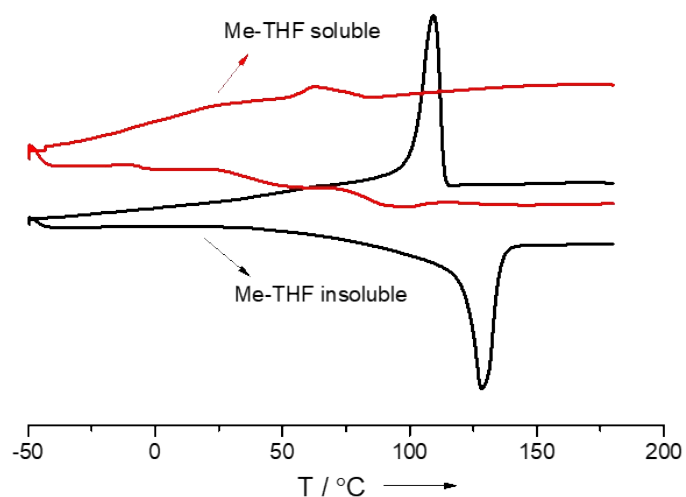

**Fig. S11** DSC curves of the MTHF-soluble (red) and insoluble portion (black) of the poly(ethylene-*co*-norbornene) copolymer prepared by catalysts **1** and **2** in the presence of 10 equivalents of  $\text{ZnEt}_2$ .

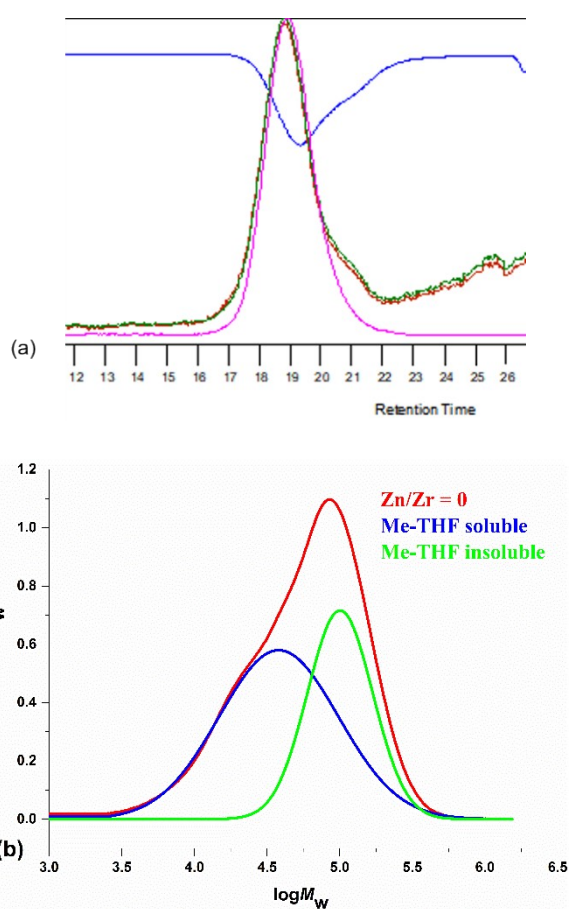

**Fig. S12** (a) GPC eluting traces of copolymer (Run 3 in Table 4) and (b) its molecular weight distributions by peak fitting.

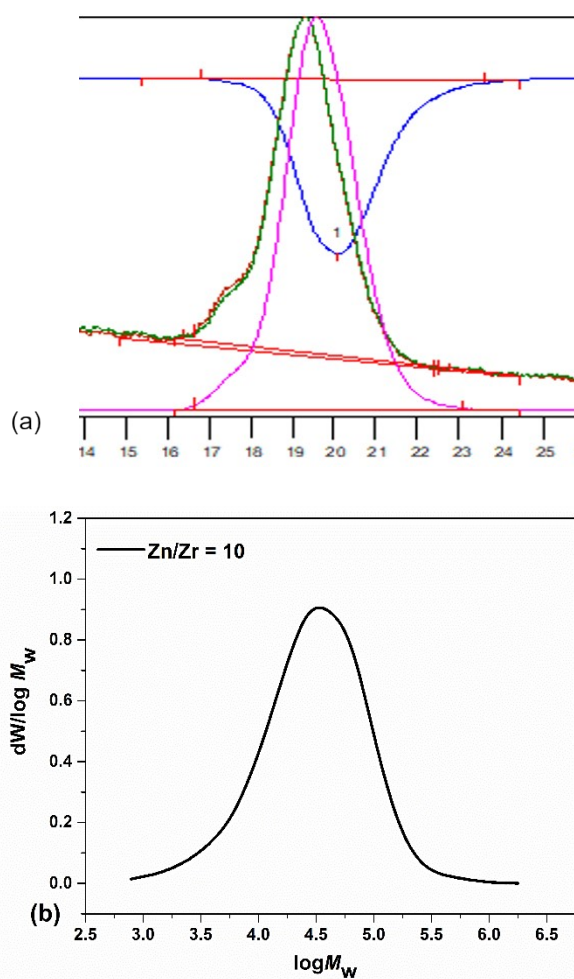

**Fig. S13** (a) GPC eluting traces of copolymer (Run 5 in Table 4 and (b) its molecular weight distribution curve.

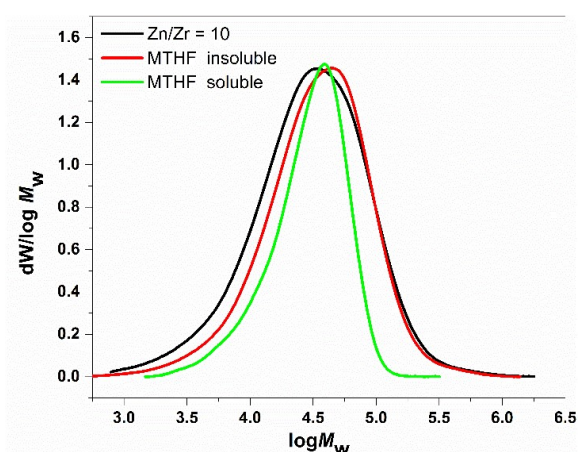

**Fig. S14** Molecular weight distribution curves of polymers before (black curve, Run 5 in Table 4) and after MTHF fraction (red curve: MTFH insoluble; green curve: MTFH soluble portion).

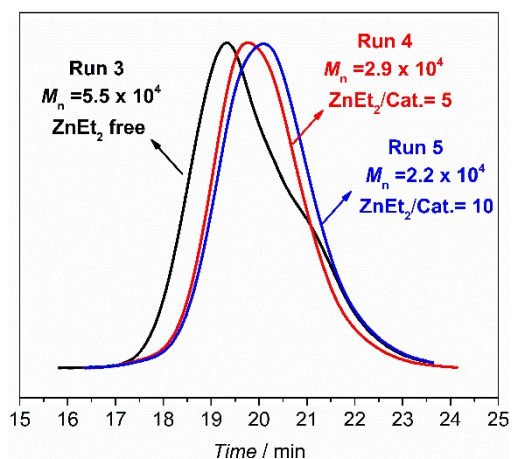

**Fig. S15** Molecular weight distribution curves of polymers prepared without (black curve, Run 3 in Table 4) and with 5 (red curve, Run 4 in Table 4), 10 equivalents of Et<sub>2</sub>Zn (blue curve, Run 5 in Table 4).

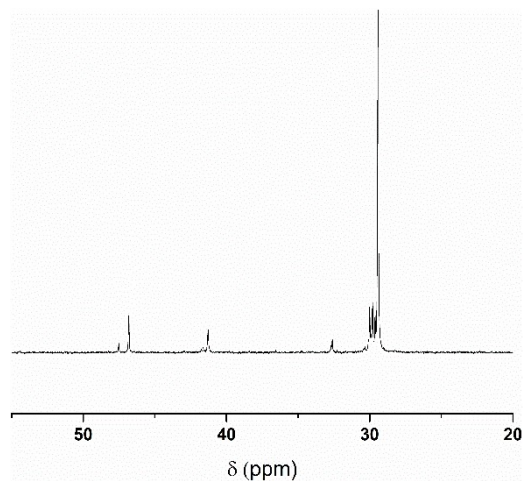

**Fig. S16** <sup>13</sup>C{<sup>1</sup>H} NMR spectrum of copolymer obtained by Cat. 1 (Run 1 in Table 4).

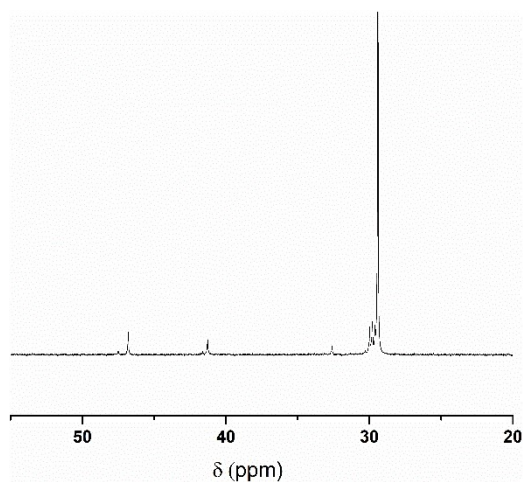

**Fig. S17** <sup>13</sup>C{<sup>1</sup>H} NMR spectrum of copolymer prepared by two catalysts without Et<sub>2</sub>Zn (Run 3 in Table 4).

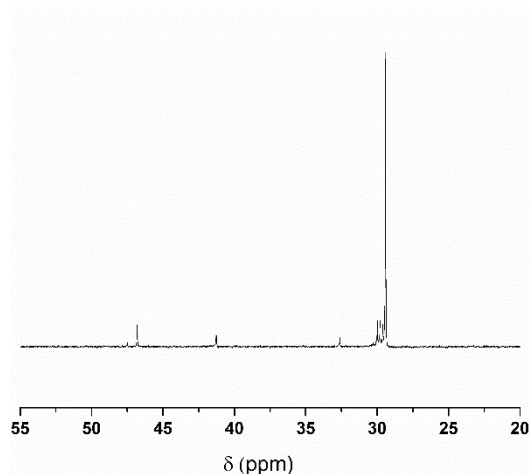

**Fig. S18**  $^{13}\text{C}\{^1\text{H}\}$  NMR spectrum of polyethylene/poly(ethylene-*co*-norbornene) multiblock copolymer prepared by two catalysts with 5 equivalents of  $\text{Et}_2\text{Zn}$  (Run 4 in Table 4).

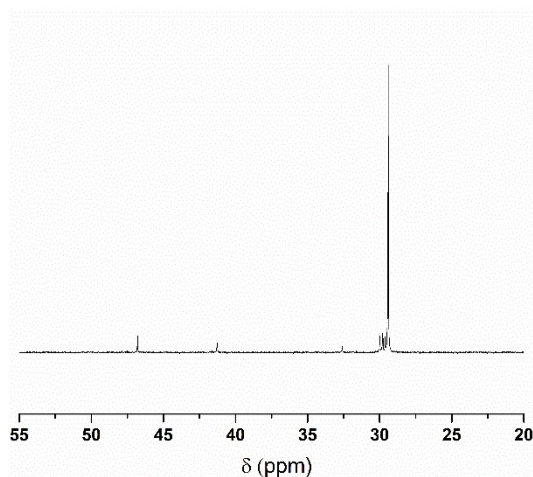

**Fig. S19**  $^{13}\text{C}\{^1\text{H}\}$  NMR spectrum of polyethylene/poly(ethylene-*co*-norbornene) multiblock copolymer prepared by two catalysts with 10 equivalents of  $\text{Et}_2\text{Zn}$  (Run 5 in Table 4)

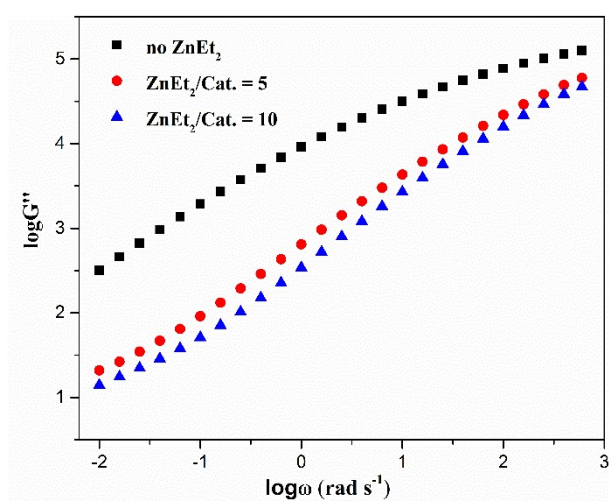

**Fig. S20** Loss modulus of copolymers obtained with variable  $\text{ZnEt}_2$ /catalyst ratio (Runs 3-5 in Table 4) at 170 °C.



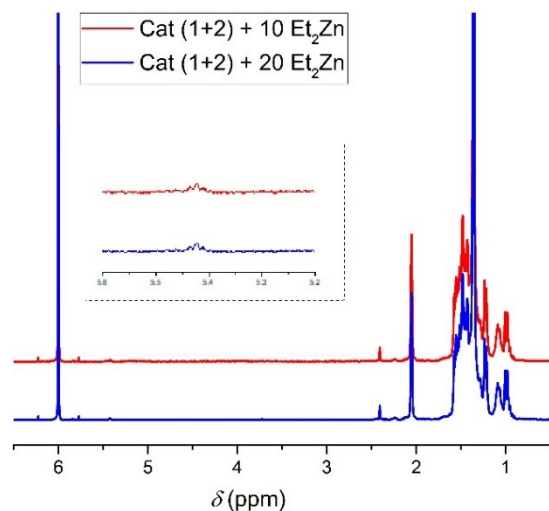

**Fig. S21**  $^1\text{H}$  NMR spectra and expansions (between 4.4 and 5.7 ppm) of copolymer under high reaction temperature (Run 4-5 Table 4).

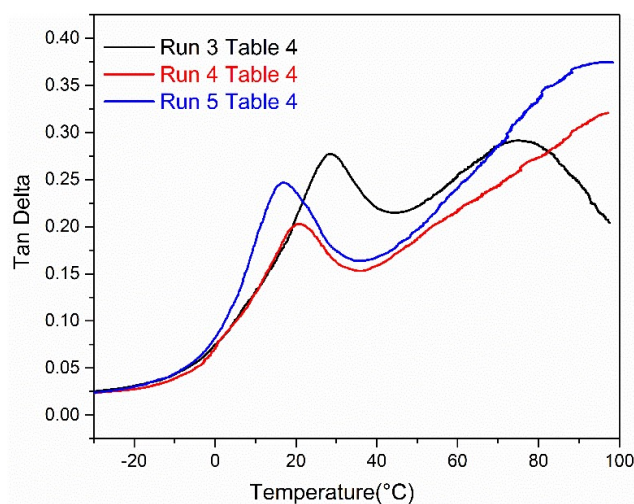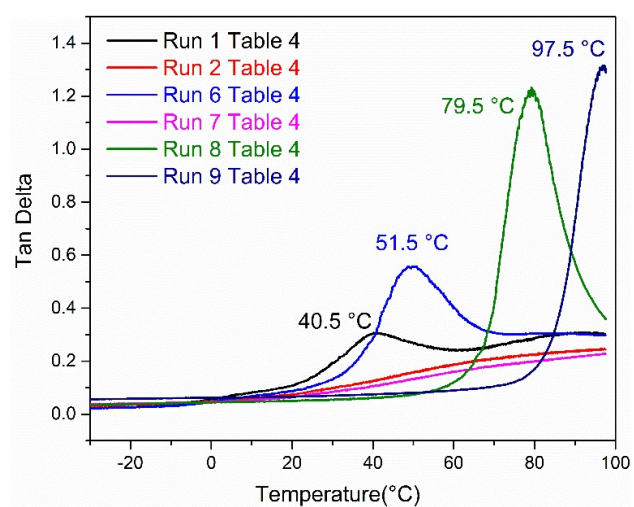

**Fig. S22** DMA of copolymers obtained with variable  $\text{ZnEt}_2/\text{catalyst}$  ratio (Table 4).

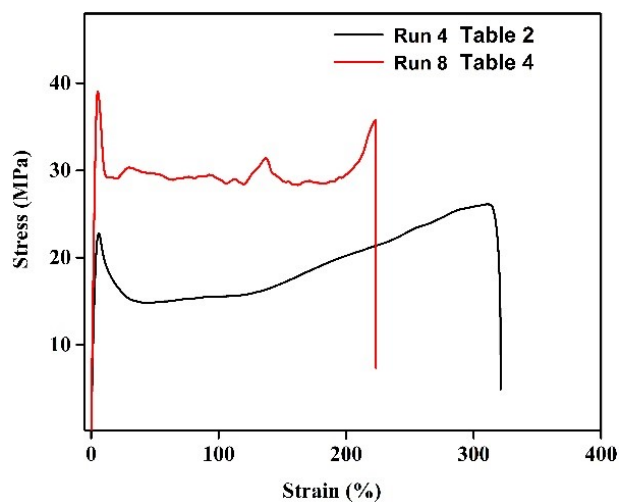

| Sample        | $\sigma^a$ (Mpa) | E <sup>b</sup> (Mpa) | $\epsilon^c$ (%) |
|---------------|------------------|----------------------|------------------|
| Run 4 Table 2 | 26.0±1.6         | 7.2±0.41             | 313±17           |
| Run 8 Table 4 | 39.2±2.1         | 11.0±0.53            | 222±15           |

<sup>a</sup>Tensile strength. <sup>b</sup>Young's modulus. <sup>c</sup>Strain at break.

**Fig. S23** Tensile properties of copolymers obtained with Cat.1 or (Cat.1+Cat.2)\ ZnEt<sub>2</sub> (Run 4 Table 2 and Run 8 Table 4).
